# Supplementary material for: Explainable AI Reveals a Critical Interplay Between Lignin and Moisture in Limiting Biochemical Methane Potential
Source: Research Square preprint supplement (doi:10.21203/rs.3.rs-8207280/v1), 2026-02-04
Supplement: Supplementary file 1 [file 5adc5b92fdecec8327600d14.docx]

Supplementary Information


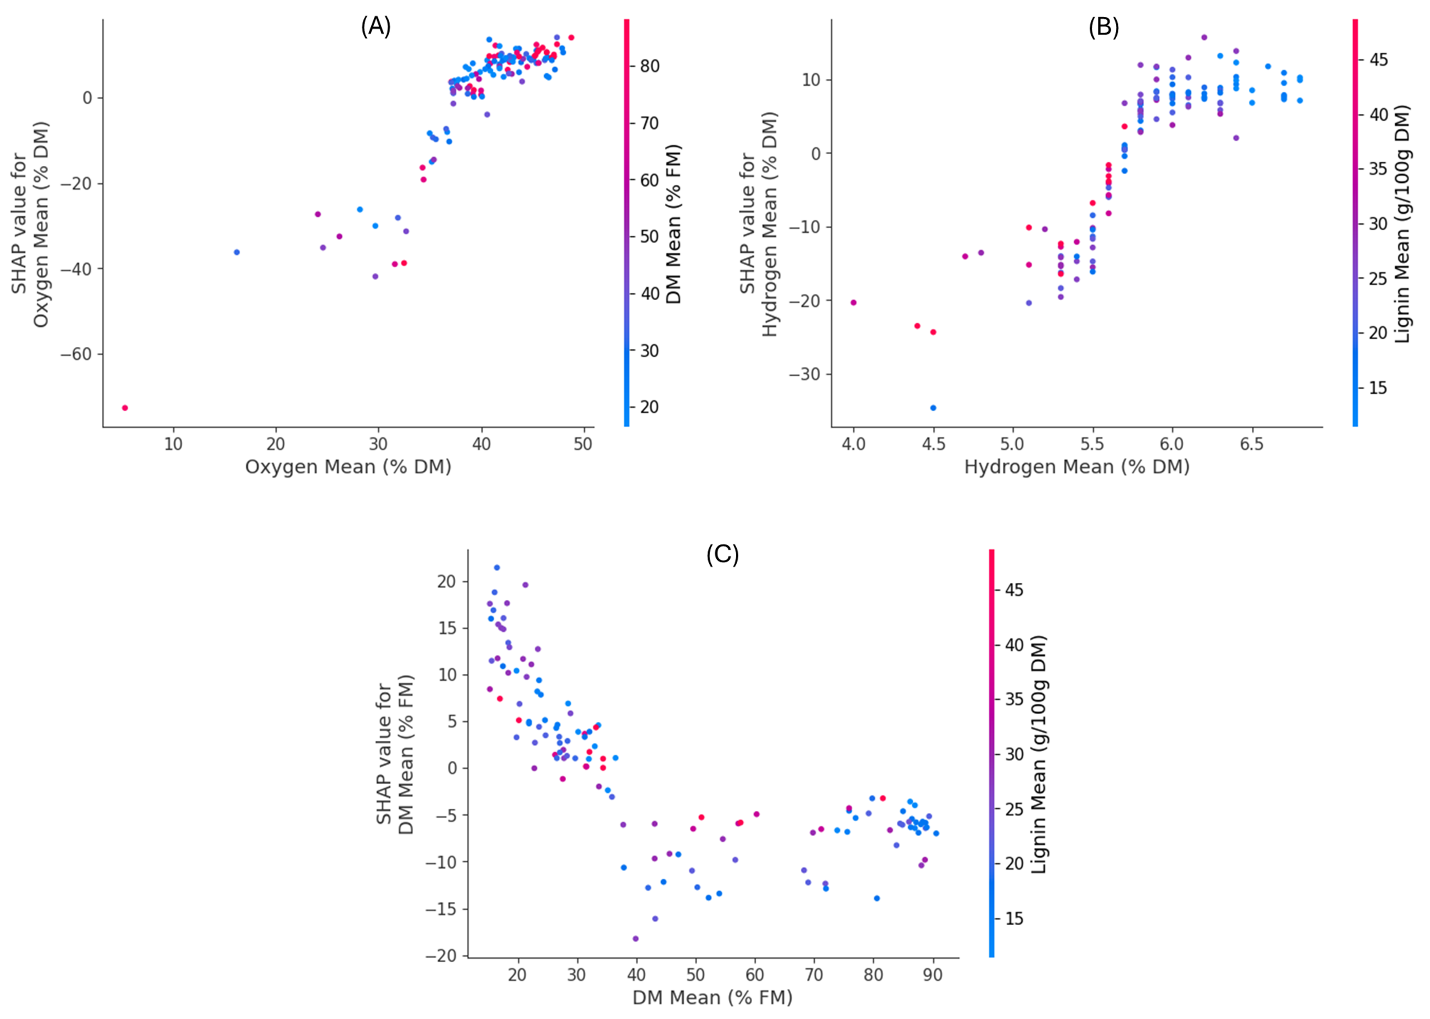


Figure S1: SHAP dependence plots for other top features. (A) Oxygen, colored by DM. (B) Hydrogen, colored by Lignin. (C) DM, colored by Lignin.
